# Supplementary material
Source: PubMed Central journal article supplement (PMC3933495)
Supplement: epi-8-1355-s01.pdf [file epi-8-1355-s01.pdf]

## **Supplemental Material to:**

**Francisco Sánchez-Vega, Valer Gotea, Hanna M  
Petrykowska, Gennady Margolin, Thomas C Krivak, Julie A  
DeLoia, Daphne W Bell, and Laura Elnitski**

**Recurrent patterns of DNA methylation in the ZNF154,  
CASP8, and VHL promoters across a wide spectrum of  
human solid epithelial tumors and cancer cell lines**

**Epigenetics 2013; 8(12)**

**<http://dx.doi.org/10.4161/epi.26701>**

**[http://www.landesbioscience.com/journals/epigenetics/  
article/26701/](http://www.landesbioscience.com/journals/epigenetics/article/26701/)**

# Recurrent patterns of DNA methylation in the *ZNF154*, *CASP8* and *VHL* promoters across a wide spectrum of human solid epithelial tumors and cancer cell lines

---

## Authors

Francisco Sánchez-Vega<sup>1</sup>, Valer Gotea<sup>1</sup>, Hanna M. Petrykowska<sup>1</sup>, Gennady Margolin<sup>1</sup>, Thomas C. Krivak<sup>2</sup>, Julie A. DeLoia<sup>3</sup>, Daphne W. Bell<sup>4</sup> and Laura Elnitski<sup>1</sup>

<sup>1</sup>Genome Technology Branch and <sup>4</sup>Cancer Genetics Branch, National Human Genome Research Institute, National Institutes of Health, Bethesda, Maryland, <sup>2</sup> Department of Obstetrics, Gynecology and Reproductive Sciences, University of Pittsburgh Medical School, Pittsburgh, Pennsylvania, and <sup>3</sup> School of Public Health and Health Services, The George Washington University, Washington D.C., United States of America.

---

## Supplemental material

---

### List of supplemental figures:

- Figure S1: Methylation at selected loci for tumors with low *ZNF154* promoter methylation.
- Figure S2: Methylation at cg26799474 vs. expression of *CASP8*.
- Figure S3: Methylation at cg16869108 vs. expression of *VHL*.
- Figure S4: Differential methylation near cg26799474-*CASP8* in cell lines and tissues.
- Figure S5: Differential methylation near cg16869108-*VHL* in cell lines and tissues.
- Figure S6: Analysis of batch effects in TCGA methylation data.

### List of supplemental tables:

- Table S1: ENCODE cell-lines used in methylation analysis.
- Table S2: DNaseI hypersensitivity data for *ZNF154*, *CASP8* and *VHL*.
- Table S3: Differentially methylated probes in ovarian serous tumors.
- Table S4: Differentially methylated probes in endometrioid ovarian and endometrioid endometrial tumors.

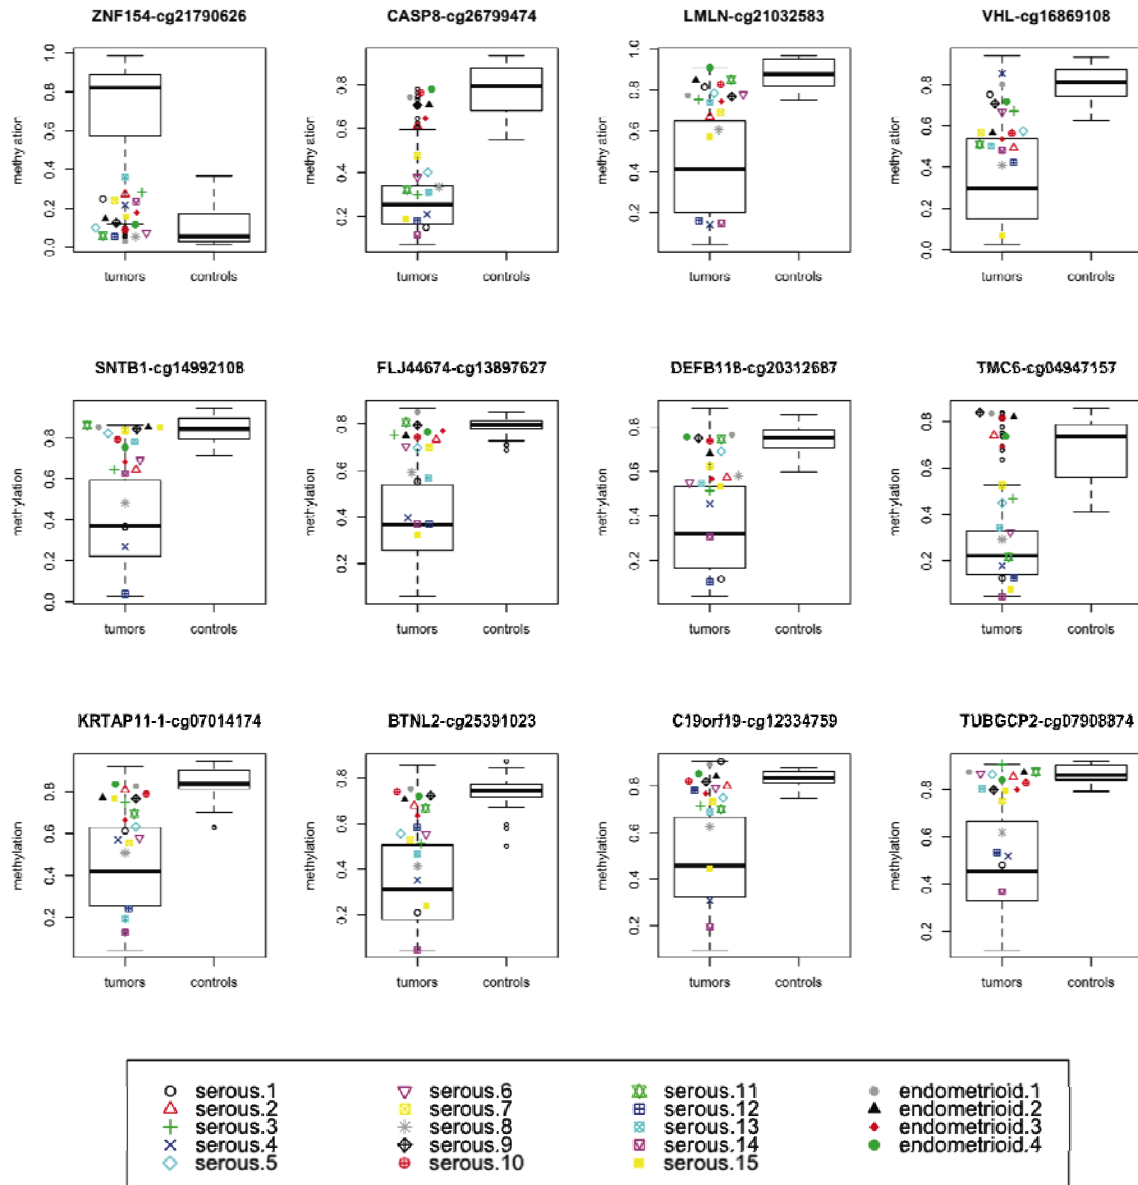

**Figure S1.** Methylation levels at selected loci for ovarian and endometrial cancer samples with relatively low levels of methylation at *cg21790626-ZNF154*. The sample labeled as ‘endometrioid.1’ is the only one that corresponds to an endometrial cancer sample; all the rest correspond to ovarian tumors (either from the serous or the endometrioid histopathological subtypes). The vertical axes show level of methylation (beta values). Points correspond to individual samples, and they are superimposed over boxplots computed over the tumor and control subsets of the full sample collection.

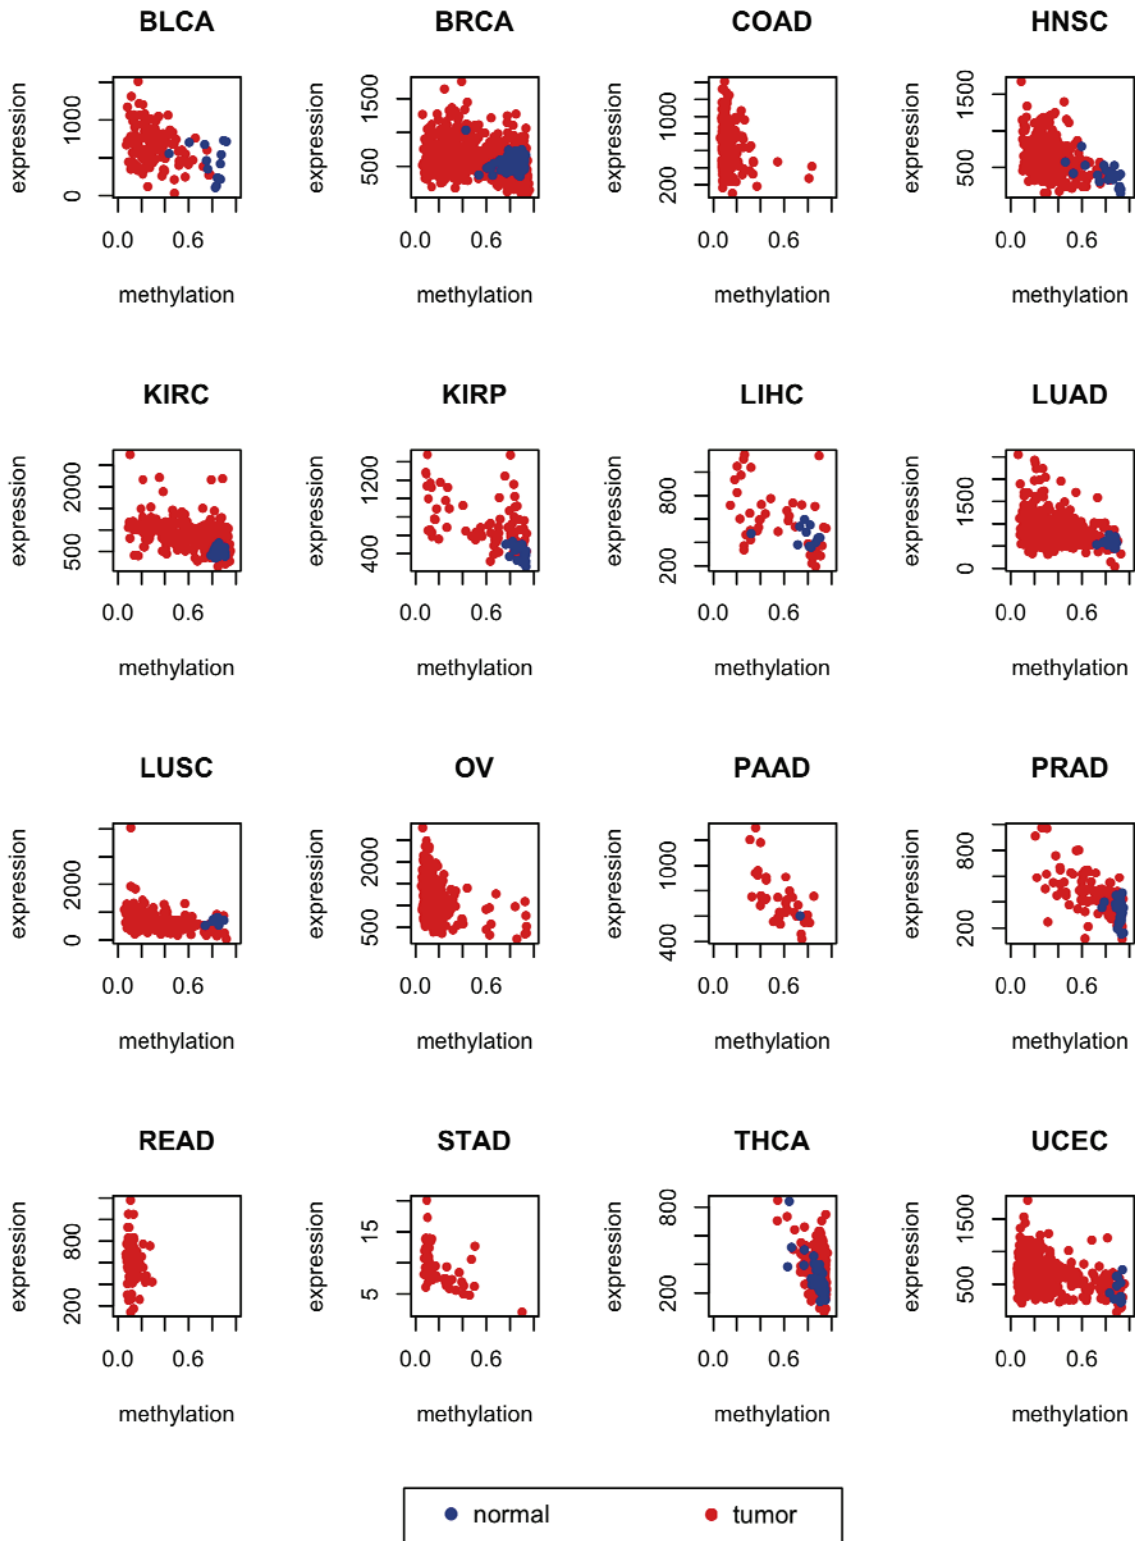

**Figure S2.** Expression of *CASP8* vs. methylation at probe cg26799474 in different cancer types from TCGA. RNA-Seq data was used for the STAD type and RNA-Seq V2 was used for all the other types (see “Materials and Methods” for details). Combined methylation and expression data was not available for any normal controls of the COAD, OV, READ and STAD types. Values of Spearman correlation, together with their associated levels of significance, are provided in Table 4.

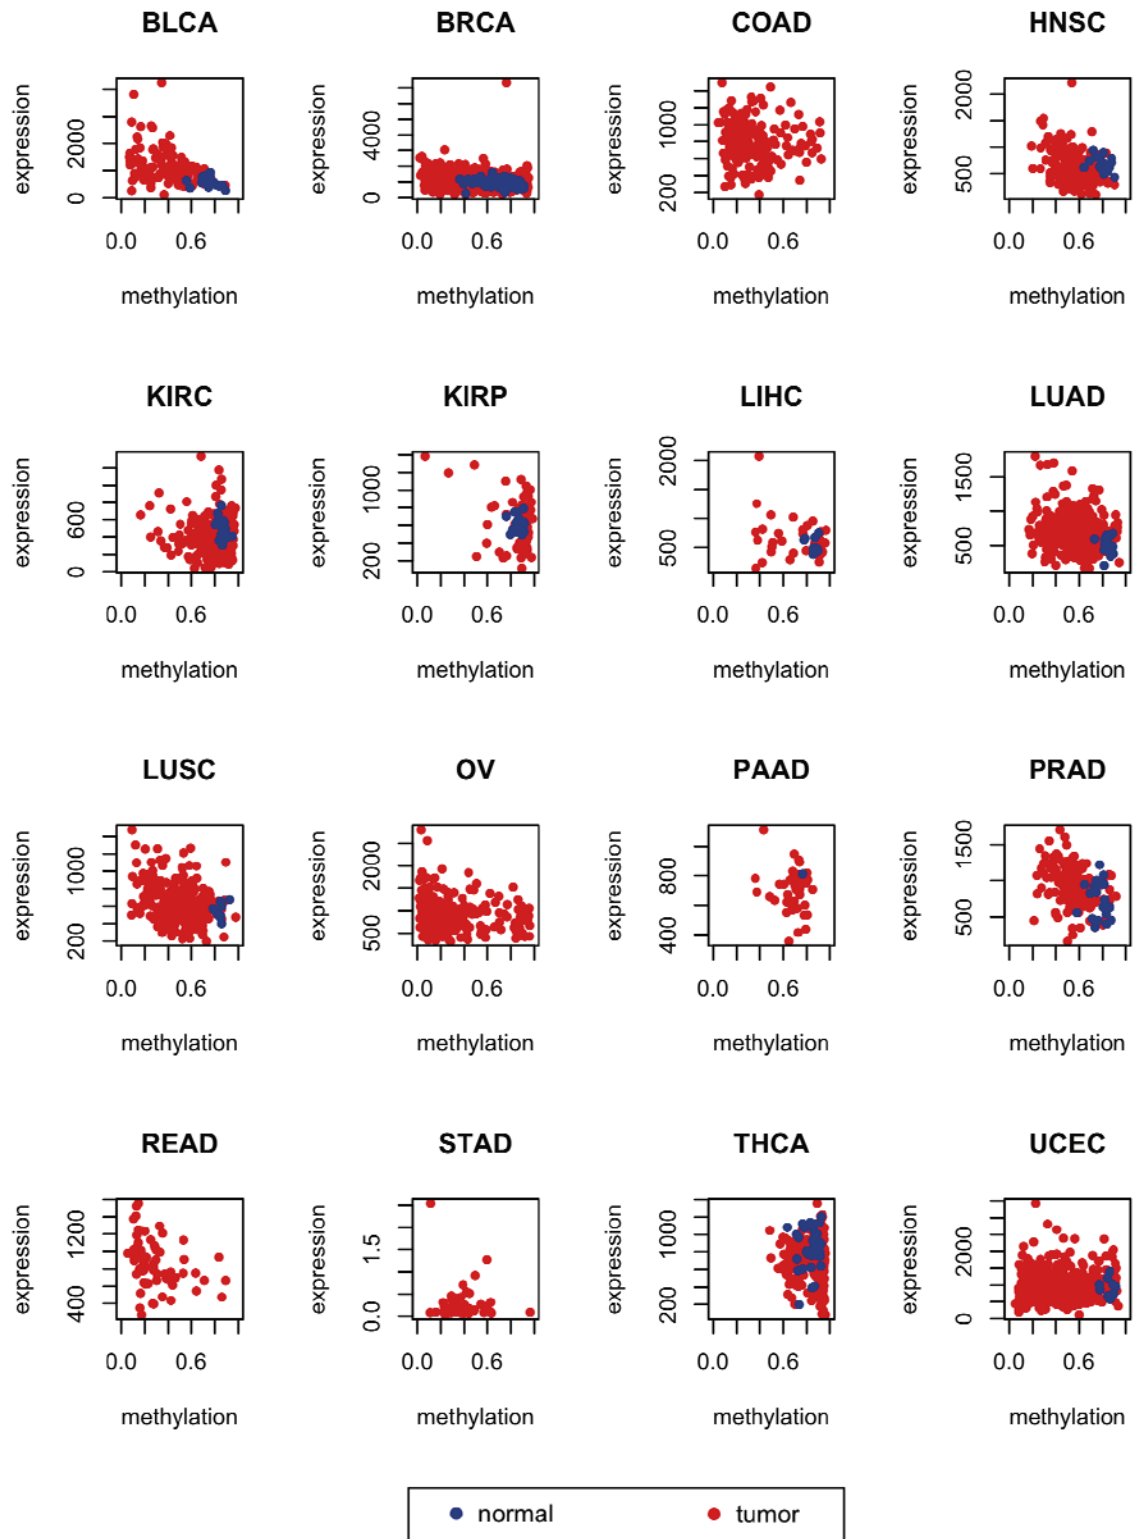

**Figure S3.** Expression of *VHL* vs. methylation at probe cg16869108 in different cancer types from TCGA. RNA-Seq data was used for the STAD type and RNA-Seq V2 was used for all the other types (see “Materials and Methods” for details). Combined methylation and expression data was not available for any normal controls of the COAD, OV, READ and STAD types. Values of Spearman correlation, together with their associated levels of significance, are provided in Table 4.



**Figure S4.** Methylation near probe cg26799474 (highlighted in red), which is located near the promoter of gene *CASP8*. **(A)** Methylation levels in ENCODE cell lines. The heat map shows beta values for each pair of probe (columns) and cell line (rows). Rows are ordered according to decreasing values of methylation at cg26799474, from top to bottom. The color side bar on the left shows cancer (magenta), normal (green) and unspecified (black) cell line annotations as provided by ENCODE. Probes located within 1 kb upstream from the TSS (blue), at the 1<sup>st</sup> exon (orange) and 1 kb downstream from the TSS (cyan) are highlighted. The bar plot above the heat map shows the difference in median methylation in cancer cell lines minus median methylation in normal cell lines for each individual probe. **(B)** Difference in median methylation in tumors vs. controls in different cancer types from TCGA. The color notation and the probe locations are the same as in the top panel. Positive values correspond to hypermethylation in tumors. Bars corresponding to probes that were masked as 'not available' (NA) in level 3 data from TCGA are shown as empty horizontal gaps.

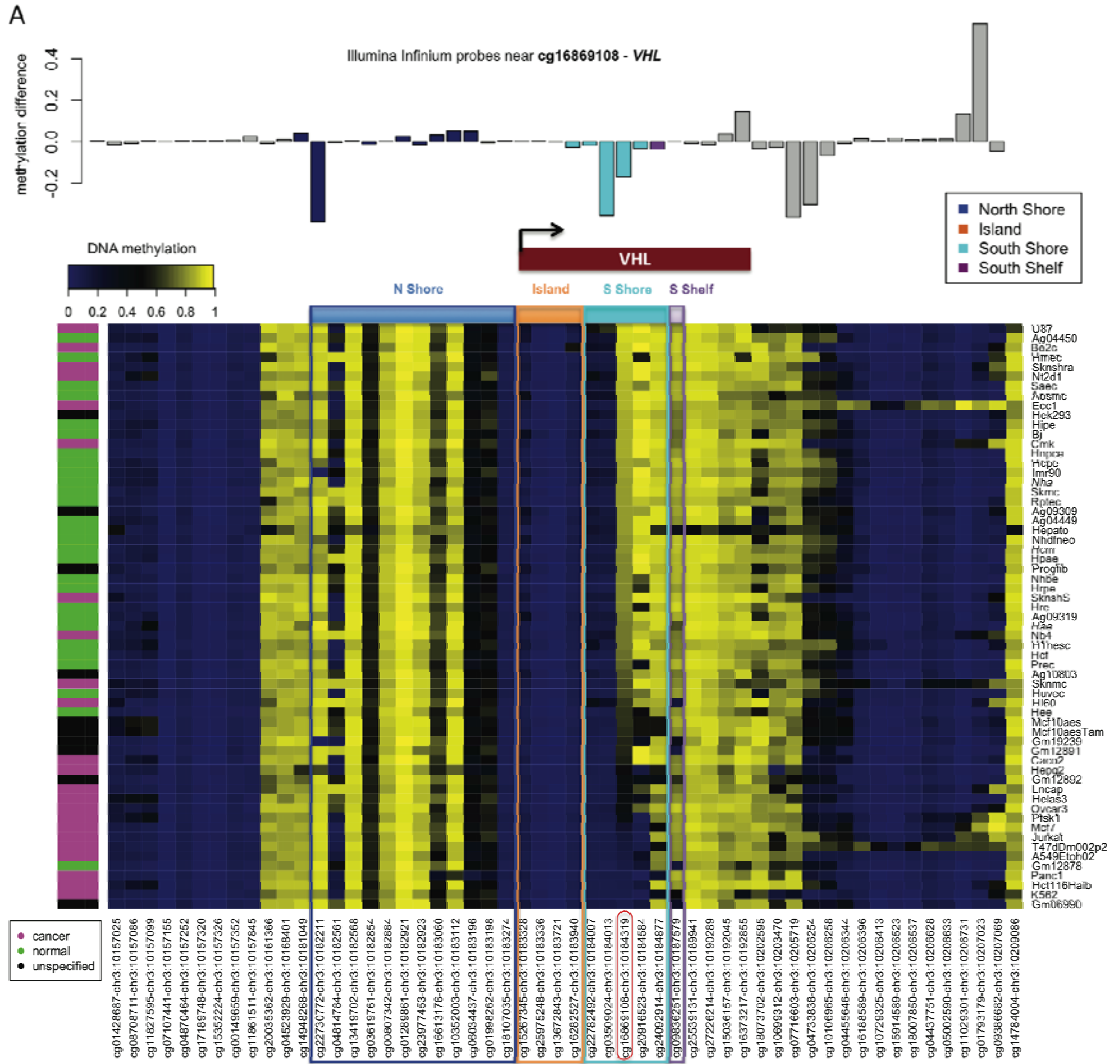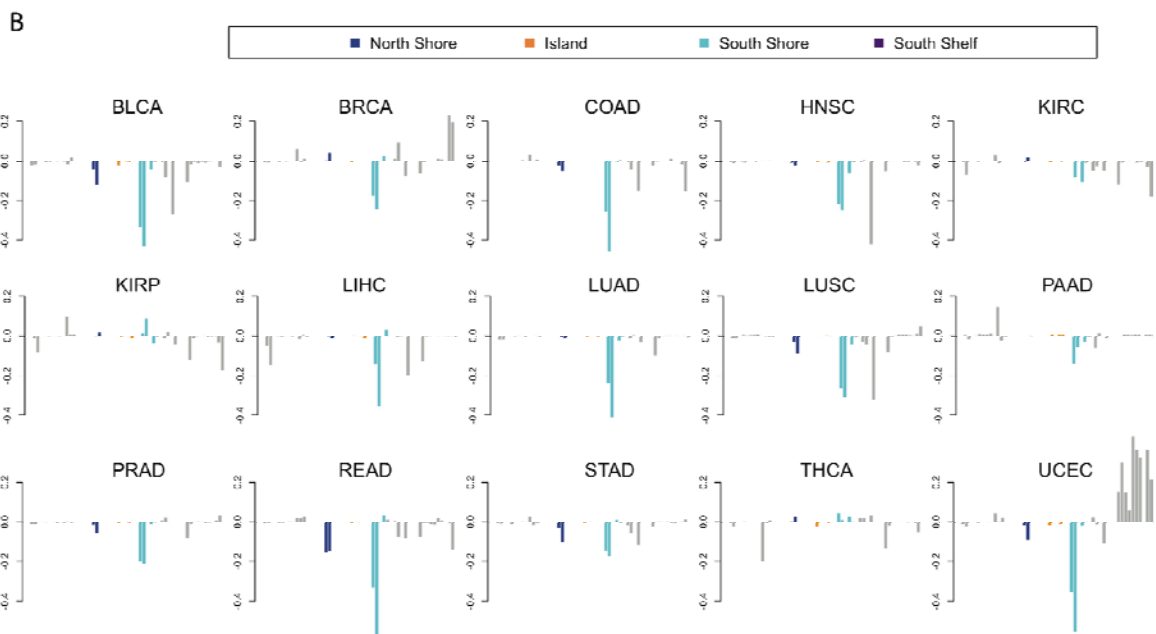



**Figure S5.** Methylation near probe cg16869108 (highlighted in red), which is located in the south shore of a CpG island near the promoter of gene *VHL*. **(A)** Methylation levels in ENCODE cell lines. The heat map shows beta values for each pair of probe (columns) and cell line (rows). Rows are ordered according to decreasing values of methylation at cg16869108, from top to bottom. The color side bar on the left shows cancer (magenta), normal (green) and unspecified (black) cell line annotations as provided by ENCODE. Probes located within the north shore (blue), island (orange), south shore (cyan) and south shelf (purple) of the CpG island are highlighted. The bar plot above the heat map shows the difference in median methylation in cancer cell lines minus median methylation in normal cell lines for each individual probe. **(B)** Difference in median methylation in tumors vs. controls in different cancer types from TCGA. The color notation and the probe locations are the same as in the top panel. Positive values correspond to hypermethylation in tumors. Bars corresponding to probes that were masked as 'not available' (NA) in level 3 data from TCGA are shown as empty horizontal gaps.

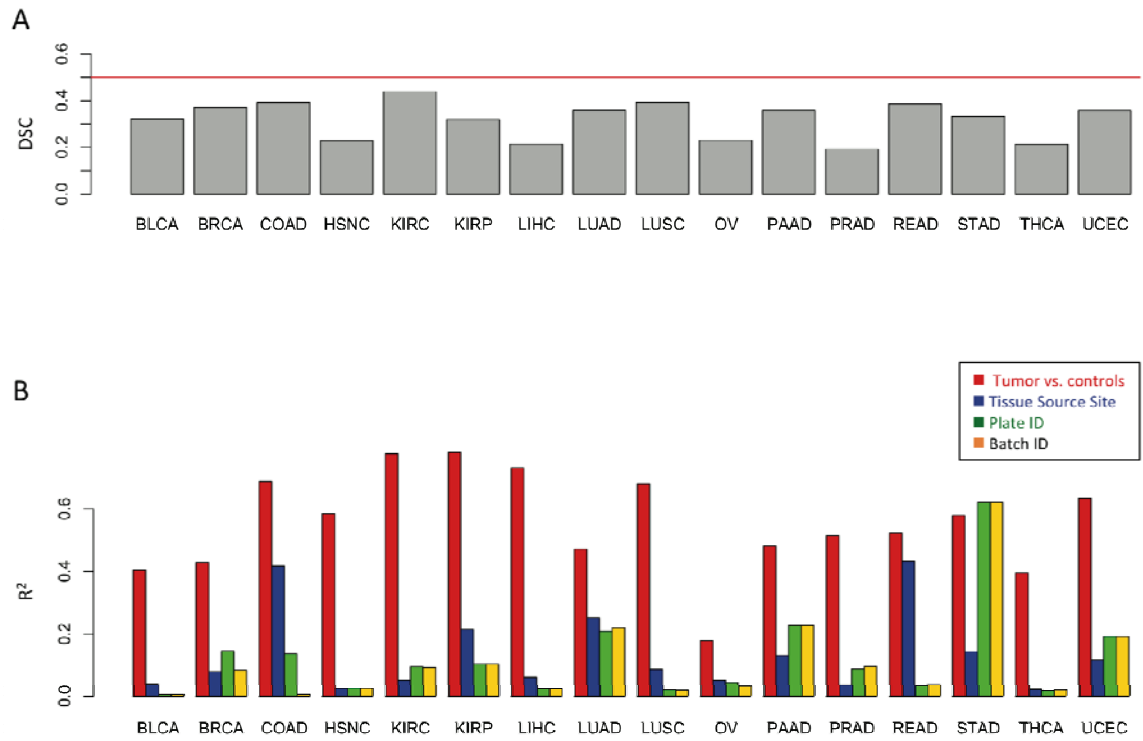

**Figure S6.** Analysis of batch effects on methylation data from TCGA. (a) DSC metric computed for each individual cancer type. (b) Percentage of variability of several labels explained by top five principal components ( $R^2$ ) for each individual cancer type.

**Table S1: ENCODE cell-lines used in methylation analysis.**

| <b>cell</b> | <b>Description</b>                                              | <b>Lineage</b>  | <b>Tissue</b>       | <b>Karyo</b> |
|-------------|-----------------------------------------------------------------|-----------------|---------------------|--------------|
| A549        | epithelial cell line derived from a lung carcinoma tissue       | endoderm        | epithelium          | cancer       |
| AG04449     | fetal buttock/thigh fibroblast                                  | --              | skin                | normal       |
| AG04450     | fetal lung fibroblast                                           | endoderm        | lung                | normal       |
| AG09309     | adult toe fibroblast                                            | --              | skin                | --           |
| AG09319     | gum tissue fibroblasts                                          | --              | gingival            | normal       |
| AG10803     | abdominal skin fibroblasts                                      | --              | skin                | --           |
| AoSMC       | aortic smooth muscle cells                                      | mesoderm        | blood vessel        | normal       |
| BE2_C       | neuroblastoma                                                   | ectoderm        | brain               | cancer       |
| BJ          | skin fibroblast                                                 | --              | skin                | normal       |
| Caco-2      | colorectal adenocarcinoma                                       | endoderm        | colon               | cancer       |
| CMK         | acute megakaryocytic leukemia cells                             | mesoderm        | blood               | cancer       |
| ECC-1       | epithelial cell line derived from an endometrium adenocarcinoma | endoderm        | luminal epithelium  | cancer       |
| GM06990     | B-lymphocyte, lymphoblastoid                                    | mesoderm        | blood               | --           |
| GM12878     | B-lymphocyte, lymphoblastoid                                    | mesoderm        | blood               | normal       |
| GM12891     | B-lymphocyte, lymphoblastoid                                    | mesoderm        | blood               | --           |
| GM12892     | B-lymphocyte, lymphoblastoid                                    | mesoderm        | blood               | --           |
| GM19239     | B-lymphocyte, lymphoblastoid                                    | mesoderm        | blood               | --           |
| H1-hESC     | embryonic stem cells                                            | inner cell mass | embryonic stem cell | normal       |
| HAEPiC      | amniotic epithelial cells                                       | --              | epithelium          | normal       |
| HCF         | cardiac fibroblasts                                             | mesoderm        | heart               | normal       |
| HCM         | cardiac myocytes                                                | mesoderm        | heart               | normal       |
| HCPEpiC     | choroid plexus epithelial cells                                 | ectoderm        | epithelium          | normal       |
| HCT-116     | colorectal carcinoma                                            | endoderm        | colon               | cancer       |
| HEEPiC      | esophageal epithelial cells                                     | endoderm        | epithelium          | normal       |
| HEK293      | embryonic kidney                                                | mesoderm        | kidney              | --           |
| HeLa-S3     | cervical carcinoma                                              | ectoderm        | cervix              | cancer       |
| Hepatocytes | primary hepatocytes                                             | endoderm        | liver               | normal       |
| HepG2       | hepatocellular carcinoma                                        | endoderm        | liver               | cancer       |
| HIPEpiC     | iris pigment epithelial cells                                   | ectoderm        | epithelium          | normal       |
| HL-60       | promyelocytic leukemia cells                                    | mesoderm        | blood               | cancer       |
| HMEC        | mammary epithelial cells                                        | ectoderm        | breast              | normal       |
| HNPCEpiC    | non-pigment ciliary epithelial cells                            | --              | epithelium          | normal       |
| HPAEpiC     | pulmonary alveolar epithelial cells                             | --              | epithelium          | normal       |
| HRE         | renal epithelial cells                                          | mesoderm        | epithelium          | normal       |
| HRPEpiC     | retinal pigment epithelial cells                                | ectoderm        | epithelium          | normal       |
| HUVEC       | umbilical vein endothelial cells                                | mesoderm        | blood vessel        | normal       |
| IMR90       | fetal lung fibroblasts                                          | endoderm        | lung                | normal       |
| Jurkat      | T lymphoblastoid derived from an acute T cell leukemia          | mesoderm        | blood               | cancer       |

|                   |                                                                                            |                    |            |        |
|-------------------|--------------------------------------------------------------------------------------------|--------------------|------------|--------|
| K562              | leukemia                                                                                   | mesoderm           | blood      | cancer |
| LNCaP             | prostate adenocarcinoma                                                                    | endoderm           | prostate   | cancer |
| MCF10A-Er-<br>Src | mammary gland, non-tumorigenic<br>epithelial                                               | ectoderm           | breast     | --     |
| MCF10A-<br>Es-Tam | mammary gland, non-tumorigenic<br>epithelial                                               | ectoderm           | breast     | --     |
| MCF-7             | mammary gland, adenocarcinoma                                                              | ectoderm           | breast     | cancer |
| NB4               | acute promyelocytic leukemia cell<br>line                                                  | mesoderm           | blood      | cancer |
| NH-A              | astrocytes                                                                                 | ectoderm           | brain      | normal |
| NHBE              | bronchial epithelial cells                                                                 | endoderm           | epithelium | normal |
| NHDF-neo          | neonatal dermal fibroblasts                                                                | mesoderm           | skin       | normal |
| NT2-D1            | malignant pluripotent embryonal<br>carcinoma                                               | inner cell<br>mass | testis     | cancer |
| ovcar-3           | ovarian adenocarcinoma                                                                     | mesoderm           | ovary      | cancer |
| PANC-1            | pancreatic carcinoma                                                                       | endoderm           | pancreas   | cancer |
| PFSK-1            | neuroectodermal cell line derived<br>from a cerebral brain tumor                           | ectoderm           | brain      | cancer |
| PrEC              | prostate epithelial cell line                                                              | epithelial         | prostate   | normal |
| ProgFib           | fibroblasts, Hutchinson-Gilford<br>progeria syndrome                                       | --                 | skin       | --     |
| RPTEC             | renal proximal tubule epithelial cells                                                     | --                 | epithelium | normal |
| SAEC              | small airway epithelial cells                                                              | endoderm           | epithelium | normal |
| SkMC              | Skeletal Striated Muscle Cells                                                             | missing            | muscle     | normal |
| SK-N-MC           | neuroepithelioma cell line derived<br>from a metastatic supra-orbital<br>human brain tumor | ectoderm           | brain      | cancer |
| SK-N-<br>SH_RA    | neuroblastoma                                                                              | ectoderm           | brain      | cancer |
| SK-N-SH_S         | human neuroblastoma                                                                        | ectoderm           | brain      | cancer |
| T-47D             | epithelial cell line derived from a<br>mammary ductal carcinoma.                           | --                 | breast     | cancer |
| U87               | glioblastoma, astrocytoma                                                                  | ectoderm           | brain      | cancer |

**Table S2: DNaseI hypersensitivity data for *ZNF154*, *CASP8* and *VHL*.****DNaseI hypersensitivity data for *ZNF154*** Cluster position: chr19:58,219,906-58,220,755

| <b>cellType</b> | <b>treatment</b> | <b>lab</b> | <b>karyotype</b> | <b>inCluster</b> | <b>signal</b> |
|-----------------|------------------|------------|------------------|------------------|---------------|
| 8988T           | None             | Duke       | cancer           | 0                | 0             |
| A549            | None             | AWG        | cancer           | 0                | 0             |
| Adult_CD4_Th0   | None             | UW         | normal           | 1                | 34            |
| AG04449         | None             | UW         | normal           | 1                | 24            |
| AG04450         | None             | UW         | normal           | 1                | 27            |
| AG09309         | None             | UW         | NA               | 1                | 28            |
| AG09319         | None             | UW         | normal           | 1                | 37            |
| AG10803         | None             | UW         | NA               | 1                | 21            |
| AoAF            | None             | UW         | normal           | 1                | 34            |
| AoSMC           | serum_free_media | Duke       | normal           | 1                | 27            |
| BE2_C           | None             | UW         | cancer           | 0                | 0             |
| BJ              | None             | UW         | normal           | 1                | 16            |
| Caco-2          | None             | UW         | cancer           | 1                | 15.5          |
| CD20+           | None             | UW         | normal           | 1                | 92            |
| CD34+_Mobilized | None             | UW         | NA               | 1                | 157           |
| Chorion         | None             | Duke       | NA               | 1                | 17            |
| CLL             | None             | Duke       | cancer           | 1                | 59.5          |
| CMK             | None             | UW         | cancer           | 0                | 0             |
| Fibrobl         | None             | Duke       | normal           | 1                | 46            |
| FibroP          | None             | Duke       | normal           | 1                | 32            |
| Gliobla         | None             | Duke       | cancer           | 0                | 0             |
| GM06990         | None             | UW         | NA               | 0                | 0             |
| GM12864         | None             | UW         | NA               | 1                | 15.5          |
| GM12865         | None             | UW         | NA               | 1                | 50            |
| GM12878         | None             | AWG        | normal           | 1                | 23.5          |
| GM12891         | None             | Duke       | NA               | 1                | 55            |
| GM12892         | None             | Duke       | NA               | 1                | 25            |
| GM18507         | None             | Duke       | NA               | 1                | 13            |
| GM19238         | None             | Duke       | NA               | 1                | 34            |
| GM19239         | None             | Duke       | NA               | 1                | 21            |
| GM19240         | None             | Duke       | NA               | 1                | 25            |
| H1-hESC         | None             | AWG        | normal           | 1                | 45            |
| H7-hESC         | None             | UW         | NA               | 1                | 97            |
| H9ES            | None             | Duke       | NA               | 1                | 31.67         |
| HA-h            | None             | UW         | normal           | 1                | 44.5          |
| HA-sp           | None             | UW         | normal           | 1                | 15            |
| HAc             | None             | UW         | normal           | 1                | 76            |
| HAEpiC          | None             | UW         | normal           | 1                | 30            |
| HBMEC           | None             | UW         | normal           | 1                | 57            |

|               |        |      |        |   |      |
|---------------|--------|------|--------|---|------|
| HCF           | None   | UW   | normal | 1 | 50.5 |
| HCFaa         | None   | UW   | normal | 1 | 22   |
| HCM           | None   | UW   | normal | 1 | 65   |
| HConF         | None   | UW   | NA     | 1 | 60   |
| HCPEpiC       | None   | UW   | normal | 1 | 52   |
| HCT-116       | None   | UW   | cancer | 0 | 0    |
| HEEpiC        | None   | UW   | normal | 1 | 15   |
| HeLa-S3       | IFNa4h | Duke | cancer | 0 | 0    |
| HeLa-S3       | None   | AWG  | cancer | 0 | 0    |
| Hepatocytes   | None   | Duke | normal | 0 | 0    |
| HepG2         | None   | AWG  | cancer | 0 | 0    |
| HFF           | None   | UW   | normal | 1 | 66   |
| HFF-Myc       | None   | UW   | normal | 1 | 27   |
| HGF           | None   | UW   | normal | 1 | 21   |
| HIPEpiC       | None   | UW   | normal | 1 | 49   |
| HL-60         | None   | UW   | cancer | 0 | 0    |
| HMEC          | None   | AWG  | normal | 1 | 39   |
| HMF           | None   | UW   | NA     | 1 | 28   |
| HMVEC-dAd     | None   | UW   | normal | 0 | 0    |
| HMVEC-dBI-Ad  | None   | UW   | normal | 1 | 35   |
| HMVEC-dBI-Neo | None   | UW   | normal | 1 | 32   |
| HMVEC-dLy-Ad  | None   | UW   | normal | 0 | 0    |
| HMVEC-dLy-Neo | None   | UW   | normal | 1 | 19   |
| HMVEC-dNeo    | None   | UW   | normal | 0 | 0    |
| HMVEC-LBI     | None   | UW   | normal | 1 | 16   |
| HMVEC-LLy     | None   | UW   | normal | 0 | 0    |
| HNPCEpiC      | None   | UW   | normal | 1 | 42   |
| HPAEC         | None   | UW   | normal | 1 | 12   |
| HPAF          | None   | UW   | normal | 1 | 135  |
| HPDE6-E6E7    | None   | Duke | normal | 1 | 25.5 |
| HPdLF         | None   | UW   | normal | 1 | 27   |
| HPF           | None   | UW   | normal | 1 | 101  |
| HRCEpiC       | None   | UW   | normal | 1 | 12   |
| HRE           | None   | UW   | normal | 1 | 33   |
| HRGEC         | None   | UW   | normal | 1 | 24   |
| HRPEpiC       | None   | UW   | normal | 1 | 39.5 |
| HSMM          | None   | AWG  | normal | 1 | 25   |
| HSMMtube      | None   | AWG  | normal | 1 | 17.5 |
| HSMM_emb      | None   | Duke | NA     | 1 | 12   |
| HTR8svn       | None   | Duke | normal | 1 | 23   |
| Huh-7         | None   | Duke | cancer | 0 | 0    |
| Huh-7.5       | None   | Duke | cancer | 0 | 0    |
| HUVEC         | None   | AWG  | normal | 1 | 15   |
| HVMF          | None   | UW   | normal | 1 | 18   |

|                             |                     |      |        |   |      |
|-----------------------------|---------------------|------|--------|---|------|
| iPS                         | None                | Duke | NA     | 1 | 73   |
| Ishikawa                    | 4OHTAM_100nM_30m    | Duke | NA     | 0 | 0    |
| Ishikawa                    | Estradiol_100nM_1hr | Duke | NA     | 0 | 0    |
| Jurkat                      | None                | UW   | cancer | 0 | 0    |
| K562                        | None                | AWG  | cancer | 1 | 12   |
| LNCaP                       | androgen            | Duke | cancer | 1 | 10   |
| LNCaP                       | None                | AWG  | cancer | 1 | 10   |
| MCF-7                       | Hypoxia_LacAcid     | Duke | cancer | 0 | 0    |
| MCF-7                       | None                | AWG  | cancer | 0 | 0    |
| Medullo                     | None                | Duke | cancer | 1 | 13   |
| Melano                      | None                | Duke | normal | 1 | 56.5 |
| Monocytes-<br>CD14+_RO01746 | None                | UW   | normal | 0 | 0    |
| Myometr                     | None                | Duke | normal | 0 | 0    |
| NB4                         | None                | UW   | cancer | 0 | 0    |
| NH-A                        | None                | UW   | normal | 1 | 49   |
| NHDF-Ad                     | None                | UW   | normal | 1 | 36.5 |
| NHDF-neo                    | None                | UW   | normal | 1 | 25   |
| NHEK                        | None                | AWG  | normal | 1 | 20   |
| NHLF                        | None                | UW   | normal | 1 | 63   |
| NT2-D1                      | None                | UW   | cancer | 1 | 69   |
| Osteobl                     | None                | Duke | normal | 1 | 35   |
| PANC-1                      | None                | UW   | cancer | 0 | 0    |
| PanIsletD                   | None                | Duke | NA     | 1 | 30.5 |
| PanIslets                   | None                | Duke | normal | 1 | 39.5 |
| pHTE                        | None                | Duke | NA     | 1 | 24   |
| PrEC                        | None                | UW   | normal | 0 | 0    |
| ProgFib                     | None                | Duke | NA     | 1 | 30   |
| RPTEC                       | None                | UW   | normal | 1 | 15   |
| RWPE1                       | None                | Duke | normal | 0 | 0    |
| SAEC                        | None                | UW   | normal | 1 | 15   |
| SK-N-MC                     | None                | UW   | cancer | 0 | 0    |
| SK-N-SH_RA                  | None                | UW   | cancer | 0 | 0    |
| SKMC                        | None                | UW   | normal | 1 | 18   |
| Stellate                    | None                | Duke | normal | 1 | 67   |
| T-47D                       | None                | Duke | cancer | 0 | 0    |
| Th1                         | None                | AWG  | NA     | 1 | 22.5 |
| Th2                         | None                | UW   | NA     | 1 | 27   |
| Urothelia                   | None                | Duke | normal | 1 | 22.5 |
| Urothelia                   | UT189               | Duke | normal | 1 | 22.5 |
| WERI-Rb-1                   | None                | UW   | cancer | 0 | 0    |
| WI-38                       | 4OHTAM_20nM_72hr    | UW   | normal | 1 | 17   |
| WI-38                       | None                | UW   | normal | 1 | 17   |

**DNaseI hypersensitivity data for CASP8** Cluster position: chr2:202,098,006-202,098,21

| <b>cellType</b> | <b>treatment</b> | <b>lab</b> | <b>karyotype</b> | <b>inCluster</b> | <b>signal</b> |
|-----------------|------------------|------------|------------------|------------------|---------------|
| 8988T           | None             | Duke       | cancer           | 1                | 31            |
| A549            | None             | AWG        | cancer           | 1                | 54            |
| Adult_CD4_Th0   | None             | UW         | normal           | 1                | 103           |
| AG04449         | None             | UW         | normal           | 0                | 0             |
| AG04450         | None             | UW         | normal           | 0                | 0             |
| AG09309         | None             | UW         | NA               | 0                | 0             |
| AG09319         | None             | UW         | normal           | 0                | 0             |
| AG10803         | None             | UW         | NA               | 0                | 0             |
| AoAF            | None             | UW         | normal           | 1                | 13            |
| AoSMC           | serum_free_media | Duke       | normal           | 0                | 0             |
| BE2_C           | None             | UW         | cancer           | 1                | 12            |
| BJ              | None             | UW         | normal           | 0                | 0             |
| Caco-2          | None             | UW         | cancer           | 1                | 91            |
| CD20+           | None             | UW         | normal           | 1                | 88            |
| CD34+_Mobilized | None             | UW         | NA               | 1                | 359           |
| Chorion         | None             | Duke       | NA               | 1                | 25            |
| CLL             | None             | Duke       | cancer           | 1                | 38            |
| CMK             | None             | UW         | cancer           | 1                | 208           |
| Fibrobl         | None             | Duke       | normal           | 0                | 0             |
| FibroP          | None             | Duke       | normal           | 1                | 13            |
| Gliobla         | None             | Duke       | cancer           | 1                | 44            |
| GM06990         | None             | UW         | NA               | 1                | 120           |
| GM12864         | None             | UW         | NA               | 1                | 241           |
| GM12865         | None             | UW         | NA               | 1                | 460           |
| GM12878         | None             | AWG        | normal           | 1                | 52            |
| GM12891         | None             | Duke       | NA               | 1                | 31            |
| GM12892         | None             | Duke       | NA               | 1                | 53            |
| GM18507         | None             | Duke       | NA               | 1                | 44            |
| GM19238         | None             | Duke       | NA               | 1                | 59            |
| GM19239         | None             | Duke       | NA               | 1                | 47            |
| GM19240         | None             | Duke       | NA               | 1                | 86            |
| H1-hESC         | None             | AWG        | normal           | 1                | 10            |
| H7-hESC         | None             | UW         | NA               | 1                | 102           |
| H9ES            | None             | Duke       | NA               | 1                | 14            |
| HA-h            | None             | UW         | normal           | 0                | 0             |
| HA-sp           | None             | UW         | normal           | 0                | 0             |
| HAc             | None             | UW         | normal           | 0                | 0             |
| HAepiC          | None             | UW         | normal           | 1                | 55            |
| HBMEC           | None             | UW         | normal           | 0                | 0             |
| HCF             | None             | UW         | normal           | 1                | 12            |



|               |        |      |        |   |     |
|---------------|--------|------|--------|---|-----|
| HCFAa         | None   | UW   | normal | 1 | 14  |
| HCM           | None   | UW   | normal | 1 | 22  |
| HConF         | None   | UW   | NA     | 0 | 0   |
| HCPEpiC       | None   | UW   | normal | 1 | 27  |
| HCT-116       | None   | UW   | cancer | 1 | 160 |
| HEEpiC        | None   | UW   | normal | 1 | 50  |
| HeLa-S3       | IFNa4h | Duke | cancer | 1 | 13  |
| HeLa-S3       | None   | AWG  | cancer | 1 | 13  |
| Hepatocytes   | None   | Duke | normal | 1 | 9   |
| HepG2         | None   | AWG  | cancer | 1 | 114 |
| HFF           | None   | UW   | normal | 0 | 0   |
| HFF-Myc       | None   | UW   | normal | 0 | 0   |
| HGF           | None   | UW   | normal | 0 | 0   |
| HIPEpiC       | None   | UW   | normal | 1 | 21  |
| HL-60         | None   | UW   | cancer | 1 | 318 |
| HMEC          | None   | AWG  | normal | 1 | 25  |
| HMF           | None   | UW   | NA     | 1 | 22  |
| HMVEC-dAd     | None   | UW   | normal | 0 | 0   |
| HMVEC-dBI-Ad  | None   | UW   | normal | 1 | 80  |
| HMVEC-dBI-Neo | None   | UW   | normal | 1 | 21  |
| HMVEC-dLy-Ad  | None   | UW   | normal | 1 | 18  |
| HMVEC-dLy-Neo | None   | UW   | normal | 0 | 0   |
| HMVEC-dNeo    | None   | UW   | normal | 0 | 0   |
| HMVEC-LBI     | None   | UW   | normal | 1 | 58  |
| HMVEC-LLy     | None   | UW   | normal | 1 | 22  |
| HNPCEpiC      | None   | UW   | normal | 0 | 0   |
| HPAEC         | None   | UW   | normal | 1 | 21  |
| HPAF          | None   | UW   | normal | 1 | 25  |
| HPDE6-E6E7    | None   | Duke | normal | 1 | 54  |
| HPdLF         | None   | UW   | normal | 1 | 12  |
| HPF           | None   | UW   | normal | 0 | 0   |
| HRCEpiC       | None   | UW   | normal | 1 | 117 |
| HRE           | None   | UW   | normal | 1 | 36  |
| HRGEC         | None   | UW   | normal | 0 | 0   |
| HRPEpiC       | None   | UW   | normal | 0 | 0   |
| HSMM          | None   | AWG  | normal | 0 | 0   |
| HSMMtube      | None   | AWG  | normal | 0 | 0   |
| HSMM_emb      | None   | Duke | NA     | 0 | 0   |
| HTR8svn       | None   | Duke | normal | 1 | 19  |
| Huh-7         | None   | Duke | cancer | 1 | 44  |
| Huh-7.5       | None   | Duke | cancer | 1 | 28  |
| HUVEC         | None   | AWG  | normal | 0 | 0   |
| HVMF          | None   | UW   | normal | 1 | 44  |
| iPS           | None   | Duke | NA     | 1 | 10  |

|                             |                     |      |        |   |      |
|-----------------------------|---------------------|------|--------|---|------|
| Ishikawa                    | 4OHTAM_100nM_30m    | Duke | NA     | 1 | 34   |
| Ishikawa                    | Estradiol_100nM_1hr | Duke | NA     | 1 | 34   |
| Jurkat                      | None                | UW   | cancer | 1 | 1252 |
| K562                        | None                | AWG  | cancer | 1 | 43   |
| LNCaP                       | androgen            | Duke | cancer | 1 | 45   |
| LNCaP                       | None                | AWG  | cancer | 1 | 45   |
| MCF-7                       | Hypoxia_LacAcid     | Duke | cancer | 1 | 76   |
| MCF-7                       | None                | AWG  | cancer | 1 | 76   |
| Medullo                     | None                | Duke | cancer | 0 | 0    |
| Melano                      | None                | Duke | normal | 0 | 0    |
| Monocytes-<br>CD14+_RO01746 | None                | UW   | normal | 1 | 368  |
| Myometr                     | None                | Duke | normal | 0 | 0    |
| NB4                         | None                | UW   | cancer | 1 | 363  |
| NH-A                        | None                | UW   | normal | 0 | 0    |
| NHDF-Ad                     | None                | UW   | normal | 1 | 19   |
| NHDF-neo                    | None                | UW   | normal | 0 | 0    |
| NHEK                        | None                | AWG  | normal | 1 | 39   |
| NHLF                        | None                | UW   | normal | 0 | 0    |
| NT2-D1                      | None                | UW   | cancer | 1 | 17   |
| Osteobl                     | None                | Duke | normal | 0 | 0    |
| PANC-1                      | None                | UW   | cancer | 1 | 96   |
| PanIsletD                   | None                | Duke | NA     | 0 | 0    |
| PanIslets                   | None                | Duke | normal | 1 | 11   |
| pHTE                        | None                | Duke | NA     | 1 | 32   |
| PrEC                        | None                | UW   | normal | 1 | 81   |
| ProgFib                     | None                | Duke | NA     | 0 | 0    |
| RPTEC                       | None                | UW   | normal | 1 | 100  |
| RWPE1                       | None                | Duke | normal | 1 | 25   |
| SAEC                        | None                | UW   | normal | 1 | 44   |
| SK-N-MC                     | None                | UW   | cancer | 1 | 29   |
| SK-N-SH_RA                  | None                | UW   | cancer | 0 | 0    |
| SKMC                        | None                | UW   | normal | 0 | 0    |
| Stellate                    | None                | Duke | normal | 0 | 0    |
| T-47D                       | None                | Duke | cancer | 1 | 20   |
| Th1                         | None                | AWG  | NA     | 1 | 87   |
| Th2                         | None                | UW   | NA     | 1 | 92   |
| Urothelia                   | None                | Duke | normal | 1 | 73   |
| Urothelia                   | UT189               | Duke | normal | 1 | 73   |
| WERI-Rb-1                   | None                | UW   | cancer | 0 | 0    |
| WI-38                       | 4OHTAM_20nM_72hr    | UW   | normal | 0 | 0    |
| WI-38                       | None                | UW   | normal | 0 | 0    |

**DNaseI hypersensitivity data for VHL**

Cluster position: chr3:10,184,306-10,185,010

| <b>cellType</b> | <b>treatment</b> | <b>lab</b> | <b>karyotype</b> | <b>inCluster</b> | <b>signal</b> |
|-----------------|------------------|------------|------------------|------------------|---------------|
| 8988T           | None             | Duke       | cancer           | 1                | 25            |
| A549            | None             | AWG        | cancer           | 1                | 17            |
| Adult_CD4_Th0   | None             | UW         | normal           | 1                | 20            |
| AG04449         | None             | UW         | normal           | 0                | 0             |
| AG04450         | None             | UW         | normal           | 0                | 0             |
| AG09309         | None             | UW         | NA               | 0                | 0             |
| AG09319         | None             | UW         | normal           | 0                | 0             |
| AG10803         | None             | UW         | NA               | 0                | 0             |
| AoAF            | None             | UW         | normal           | 0                | 0             |
| AoSMC           | serum_free_media | Duke       | normal           | 0                | 0             |
| BE2_C           | None             | UW         | cancer           | 0                | 0             |
| BJ              | None             | UW         | normal           | 0                | 0             |
| Caco-2          | None             | UW         | cancer           | 0                | 0             |
| CD20+           | None             | UW         | normal           | 0                | 0             |
| CD34+_Mobilized | None             | UW         | NA               | 1                | 15            |
| Chorion         | None             | Duke       | NA               | 1                | 12            |
| CLL             | None             | Duke       | cancer           | 1                | 8             |
| CMK             | None             | UW         | cancer           | 1                | 11            |
| Fibrobl         | None             | Duke       | normal           | 1                | 24            |
| FibroP          | None             | Duke       | normal           | 0                | 0             |
| Gliobla         | None             | Duke       | cancer           | 0                | 0             |
| GM06990         | None             | UW         | NA               | 1                | 14            |
| GM12864         | None             | UW         | NA               | 1                | 16            |
| GM12865         | None             | UW         | NA               | 1                | 34            |
| GM12878         | None             | AWG        | normal           | 1                | 20            |
| GM12891         | None             | Duke       | NA               | 0                | 0             |
| GM12892         | None             | Duke       | NA               | 1                | 14            |
| GM18507         | None             | Duke       | NA               | 1                | 25            |
| GM19238         | None             | Duke       | NA               | 1                | 28            |
| GM19239         | None             | Duke       | NA               | 1                | 10            |
| GM19240         | None             | Duke       | NA               | 1                | 13            |
| H1-hESC         | None             | AWG        | normal           | 1                | 14.5          |
| H7-hESC         | None             | UW         | NA               | 1                | 16            |
| H9ES            | None             | Duke       | NA               | 1                | 12            |
| HA-h            | None             | UW         | normal           | 0                | 0             |
| HA-sp           | None             | UW         | normal           | 0                | 0             |
| HAc             | None             | UW         | normal           | 0                | 0             |
| HAEpiC          | None             | UW         | normal           | 0                | 0             |
| HBMEC           | None             | UW         | normal           | 0                | 0             |
| HCF             | None             | UW         | normal           | 0                | 0             |
| HCFaa           | None             | UW         | normal           | 0                | 0             |

|               |                  |      |        |   |      |
|---------------|------------------|------|--------|---|------|
| HCM           | None             | UW   | normal | 0 | 0    |
| HConF         | None             | UW   | NA     | 1 | 15   |
| HCPEpiC       | None             | UW   | normal | 0 | 0    |
| HCT-116       | None             | UW   | cancer | 1 | 12   |
| HEEpiC        | None             | UW   | normal | 0 | 0    |
| HeLa-S3       | IFNa4h           | Duke | cancer | 1 | 19   |
| HeLa-S3       | None             | AWG  | cancer | 1 | 19   |
| Hepatocytes   | None             | Duke | normal | 1 | 15   |
| HepG2         | None             | AWG  | cancer | 1 | 12   |
| HFF           | None             | UW   | normal | 0 | 0    |
| HFF-Myc       | None             | UW   | normal | 1 | 12   |
| HGF           | None             | UW   | normal | 0 | 0    |
| HIPEpiC       | None             | UW   | normal | 0 | 0    |
| HL-60         | None             | UW   | cancer | 1 | 36   |
| HMEC          | None             | AWG  | normal | 1 | 29   |
| HMF           | None             | UW   | NA     | 0 | 0    |
| HMVEC-dAd     | None             | UW   | normal | 1 | 18   |
| HMVEC-dBI-Ad  | None             | UW   | normal | 1 | 25   |
| HMVEC-dBI-Neo | None             | UW   | normal | 1 | 34   |
| HMVEC-dLy-Ad  | None             | UW   | normal | 0 | 0    |
| HMVEC-dLy-Neo | None             | UW   | normal | 1 | 21   |
| HMVEC-dNeo    | None             | UW   | normal | 1 | 13   |
| HMVEC-LBI     | None             | UW   | normal | 0 | 0    |
| HMVEC-LLy     | None             | UW   | normal | 1 | 27   |
| HNPCEpiC      | None             | UW   | normal | 0 | 0    |
| HPAEC         | None             | UW   | normal | 0 | 0    |
| HPAF          | None             | UW   | normal | 0 | 0    |
| HPDE6-E6E7    | None             | Duke | normal | 0 | 0    |
| HPdLF         | None             | UW   | normal | 0 | 0    |
| HPF           | None             | UW   | normal | 0 | 0    |
| HRCEpiC       | None             | UW   | normal | 1 | 14   |
| HRE           | None             | UW   | normal | 1 | 8    |
| HRGEC         | None             | UW   | normal | 0 | 0    |
| HRPEpiC       | None             | UW   | normal | 0 | 0    |
| HSMM          | None             | AWG  | normal | 1 | 16   |
| HSMMtube      | None             | AWG  | normal | 1 | 14   |
| HSMM_emb      | None             | Duke | NA     | 0 | 0    |
| HTR8svn       | None             | Duke | normal | 0 | 0    |
| Huh-7         | None             | Duke | cancer | 1 | 24.5 |
| Huh-7.5       | None             | Duke | cancer | 1 | 26   |
| HUVEC         | None             | AWG  | normal | 0 | 0    |
| HVMF          | None             | UW   | normal | 0 | 0    |
| iPS           | None             | Duke | NA     | 1 | 12   |
| Ishikawa      | 4OHTAM_100nM_30m | Duke | NA     | 0 | 0    |

|                             |                     |      |        |   |      |
|-----------------------------|---------------------|------|--------|---|------|
| Ishikawa                    | Estradiol_100nM_1hr | Duke | NA     | 0 | 0    |
| Jurkat                      | None                | UW   | cancer | 1 | 138  |
| K562                        | None                | AWG  | cancer | 1 | 12.5 |
| LNCaP                       | androgen            | Duke | cancer | 1 | 17   |
| LNCaP                       | None                | AWG  | cancer | 1 | 17   |
| MCF-7                       | Hypoxia_LacAcid     | Duke | cancer | 1 | 21   |
| MCF-7                       | None                | AWG  | cancer | 1 | 21   |
| Medullo                     | None                | Duke | cancer | 1 | 23   |
| Melano                      | None                | Duke | normal | 0 | 0    |
| Monocytes-<br>CD14+_RO01746 | None                | UW   | normal | 0 | 0    |
| Myometr                     | None                | Duke | normal | 0 | 0    |
| NB4                         | None                | UW   | cancer | 1 | 16   |
| NH-A                        | None                | UW   | normal | 0 | 0    |
| NHDF-Ad                     | None                | UW   | normal | 0 | 0    |
| NHDF-neo                    | None                | UW   | normal | 0 | 0    |
| NHEK                        | None                | AWG  | normal | 1 | 12   |
| NHLF                        | None                | UW   | normal | 0 | 0    |
| NT2-D1                      | None                | UW   | cancer | 1 | 9    |
| Osteobl                     | None                | Duke | normal | 1 | 9    |
| PANC-1                      | None                | UW   | cancer | 1 | 14   |
| PanIsletD                   | None                | Duke | NA     | 0 | 0    |
| PanIslets                   | None                | Duke | normal | 1 | 15   |
| pHTE                        | None                | Duke | NA     | 1 | 9    |
| PrEC                        | None                | UW   | normal | 0 | 0    |
| ProgFib                     | None                | Duke | NA     | 1 | 12   |
| RPTEC                       | None                | UW   | normal | 0 | 0    |
| RWPE1                       | None                | Duke | normal | 1 | 13   |
| SAEC                        | None                | UW   | normal | 0 | 0    |
| SK-N-MC                     | None                | UW   | cancer | 0 | 0    |
| SK-N-SH_RA                  | None                | UW   | cancer | 0 | 0    |
| SKMC                        | None                | UW   | normal | 0 | 0    |
| Stellate                    | None                | Duke | normal | 1 | 9    |
| T-47D                       | None                | Duke | cancer | 1 | 21   |
| Th1                         | None                | AWG  | NA     | 1 | 45   |
| Th2                         | None                | UW   | NA     | 1 | 12   |
| Urothelia                   | None                | Duke | normal | 1 | 17   |
| Urothelia                   | UT189               | Duke | normal | 1 | 17   |
| WERI-Rb-1                   | None                | UW   | cancer | 0 | 0    |
| WI-38                       | 4OHTAM_20nM_72hr    | UW   | normal | 0 | 0    |
| WI-38                       | None                | UW   | normal | 0 | 0    |

**Table S3: Differentially methylated probes in ovarian serous tumors.**

| <b>TargetID</b> | <b>SYMBOL</b>    | <b>MAPINFO</b> | <b>MedianControls</b> | <b>MedianSerous</b> |
|-----------------|------------------|----------------|-----------------------|---------------------|
| cg21790626      | <i>ZNF154</i>    | chr19:58220494 | 0.03657751            | 0.8245316           |
| cg08668790      | <i>ZNF154</i>    | chr19:58220662 | 0.04798249            | 0.7528151           |
| cg10660256      | <i>BHMT</i>      | chr5:78407683  | 0.15657446            | 0.7689793           |
| cg12111714      | <i>ATP8A2</i>    | chr13:26043472 | 0.21386432            | 0.7116522           |
| cg19466563      | <i>SPARCL1</i>   | chr4:88450506  | 0.12725486            | 0.6153551           |
| cg22980079      | <i>C4orf8</i>    | chr4:2627118   | 0.34951692            | 0.8067046           |
| cg07922606      | <i>HIST1H3E</i>  | chr6:26225389  | 0.58709923            | 0.9540737           |
| cg17706173      | <i>C16orf30</i>  | chr16:1582581  | 0.40096894            | 0.7639955           |
| cg12880658      | <i>CDO1</i>      | chr5:115152386 | 0.01372329            | 0.3650002           |
| cg03032025      | <i>CPEB4</i>     | chr5:173316748 | 0.21587957            | 0.55323             |
| cg22462235      | <i>LEFTY2</i>    | chr1:226129481 | 0.3335976             | 0.6666326           |
| cg13705284      | <i>ACOX2</i>     | chr3:58523313  | 0.25526749            | 0.5747562           |
| cg20661303      | <i>LEFTY2</i>    | chr1:226129561 | 0.37006685            | 0.6650081           |
| cg26799474      | <i>CASP8</i>     | chr2:202098951 | 0.86851666            | 0.2382682           |
| cg20916523      | <i>VHL</i>       | chr3:10184584  | 0.84900791            | 0.2446743           |
| cg27235662      | <i>CLDN16</i>    | chr3:190105986 | 0.9039005             | 0.3055797           |
| cg21032583      | <i>LMLN</i>      | chr3:197685803 | 0.94806456            | 0.3927536           |
| cg15422147      | <i>SERPINB5</i>  | chr18:61144339 | 0.78610117            | 0.2329661           |
| cg03602500      | <i>FLJ00060</i>  | chr19:55047721 | 0.9080196             | 0.3649664           |
| cg16869108      | <i>VHL</i>       | chr3:10184319  | 0.84705703            | 0.31596             |
| cg06051311      | <i>TRIM15</i>    | chr6:30131001  | 0.76508194            | 0.2426632           |
| cg18884741      | <i>RABGEF1</i>   | chr7:66204797  | 0.93986055            | 0.425796            |
| cg14992108      | <i>SNTB1</i>     | chr8:121825470 | 0.88336541            | 0.3708138           |
| cg19306866      | <i>KRTAP6-2</i>  | chr21:31970997 | 0.95074958            | 0.4402792           |
| cg23968383      | <i>ZNF572</i>    | chr8:125984927 | 0.84402408            | 0.3348998           |
| cg14062083      | <i>KRTAP13-4</i> | chr21:31802829 | 0.88498456            | 0.3926638           |
| cg01888566      | <i>MEST</i>      | chr7:130126513 | 0.6443697             | 0.15322             |
| cg02490034      | <i>MEST</i>      | chr7:130125836 | 0.64065417            | 0.1555951           |
| cg22190114      | <i>NALP8</i>     | chr19:56459234 | 0.95209142            | 0.4803644           |
| cg17738194      | <i>GK2</i>       | chr4:80329388  | 0.77789038            | 0.3106485           |
| cg07080946      | <i>LUC7L</i>     | chr16:280046   | 0.88832313            | 0.4258908           |
| cg05244766      | <i>GSTP1</i>     | chr11:67350499 | 0.92939642            | 0.4673026           |
| cg03552103      | <i>SEPT10</i>    | chr2:110373002 | 0.645785              | 0.1871901           |
| cg07665060      | <i>C19orf33</i>  | chr19:38794598 | 0.61372166            | 0.1572842           |
| cg11804789      | <i>CST7</i>      | chr20:24929716 | 0.70464385            | 0.2490312           |
| cg24831427      | <i>COQ3</i>      | chr6:99842353  | 0.8327268             | 0.3857416           |
| cg09971811      | <i>CST7</i>      | chr20:24930099 | 0.94576574            | 0.5014663           |
| cg00344709      | <i>ANKRD21</i>   | chr21:14982225 | 0.84754433            | 0.4035949           |
| cg13897627      | <i>FLJ44674</i>  | chr16:49378497 | 0.80328256            | 0.3666835           |
| cg09682183      | <i>UNC93A</i>    | chr6:167705253 | 0.65820518            | 0.2216787           |
| cg08947964      | <i>CX62</i>      | chr6:90603803  | 0.89996261            | 0.4653748           |

|            |                  |                 |            |           |
|------------|------------------|-----------------|------------|-----------|
| cg14333454 | <i>SFN</i>       | chr1:27189298   | 0.70433774 | 0.27504   |
| cg20312687 | <i>DEFB118</i>   | chr20:29956585  | 0.76502889 | 0.3360534 |
| cg26530341 | <i>TNFRSF10A</i> | chr8:23083353   | 0.89875736 | 0.4844262 |
| cg21747271 | <i>AIP</i>       | chr11:67250052  | 0.52118809 | 0.1073659 |
| cg25612480 | <i>UBE2V2</i>    | chr8:48920460   | 0.80129709 | 0.3893233 |
| cg01883966 | <i>STK19</i>     | chr6:31938886   | 0.90706566 | 0.4984077 |
| cg24459209 | <i>PRG3</i>      | chr11:57148215  | 0.85987747 | 0.4535433 |
| cg12188860 | <i>TOP1MT</i>    | chr8:144416485  | 0.6801079  | 0.274037  |
| cg25033144 | <i>FLJ00060</i>  | chr19:55048290  | 0.91409583 | 0.5092839 |
| cg15746620 | <i>EMR3</i>      | chr19:14785849  | 0.55911787 | 0.1548895 |
| cg03544379 | <i>OR7C2</i>     | chr19:15052824  | 0.7623347  | 0.3613651 |
| cg01430430 | <i>FLJ37078</i>  | chr7:75914313   | 0.93338488 | 0.5354742 |
| cg04947157 | <i>TMC6</i>      | chr17:76128481  | 0.58527724 | 0.1874531 |
| cg07014174 | <i>KRTAP11-1</i> | chr21:32253760  | 0.9007181  | 0.5042468 |
| cg12867448 | <i>ODF2</i>      | chr9:131217480  | 0.87322244 | 0.4768746 |
| cg11695358 | <i>MAPK15</i>    | chr8:144797963  | 0.85846335 | 0.46299   |
| cg24423088 | <i>KRTAP8-1</i>  | chr21:32185365  | 0.98257501 | 0.5897868 |
| cg09828634 | <i>KRTAP19-2</i> | chr21:31859610  | 0.9153445  | 0.5230397 |
| cg25890048 | <i>OR5I1</i>     | chr11:55703443  | 0.88126531 | 0.4906895 |
| cg12348970 | <i>SLC24A2</i>   | chr9:19786543   | 0.96060129 | 0.5700768 |
| cg16592658 | <i>EBI3</i>      | chr19:4229887   | 0.65013652 | 0.2607271 |
| cg19226099 | <i>MC3R</i>      | chr20:54824085  | 0.71587515 | 0.3267257 |
| cg21624282 | <i>LOC122258</i> | chr13:113030783 | 0.90336076 | 0.5157704 |
| cg26482939 | <i>GNA15</i>     | chr19:3136710   | 0.65954876 | 0.27778   |
| cg10516359 | <i>SLC35C1</i>   | chr11:45827763  | 0.98327649 | 0.6045739 |
| cg25391023 | <i>BTNL2</i>     | chr6:32374754   | 0.76031257 | 0.3817664 |
| cg13038560 | <i>FLJ22555</i>  | chr2:200819113  | 0.95839098 | 0.5829611 |
| cg18119407 | <i>CFLAR</i>     | chr2:201980504  | 0.77127    | 0.3963556 |
| cg01136458 | <i>CSMD1</i>     | chr8:4853275    | 0.6526123  | 0.2780243 |
| cg01390445 | <i>LIPH</i>      | chr3:185271312  | 0.94620603 | 0.5726364 |
| cg12334759 | <i>C19orf19</i>  | chr19:475154    | 0.83249034 | 0.463692  |
| cg12970081 | <i>GPR32</i>     | chr19:51273924  | 0.83567477 | 0.46962   |
| cg03294491 | <i>SMAD2</i>     | chr18:45458243  | 0.60902801 | 0.2444005 |
| cg07908874 | <i>TUBGCP2</i>   | chr10:135123006 | 0.89604818 | 0.5317799 |

**Table S4: Differentially methylated probes in endometrioid ovarian and endometrioid endometrial tumors.**

| <b>TargetID</b> | <b>SYMBOL</b>     | <b>MAPINFO</b>  | <b>MedianControls</b> | <b>MedianEndo</b> |
|-----------------|-------------------|-----------------|-----------------------|-------------------|
| cg21790626      | <i>ZNF154</i>     | chr19:58220494  | 0.1510489             | 0.7978823         |
| cg13164537      | <i>CD226</i>      | chr18:67624071  | 0.2324949             | 0.77222           |
| cg12535715      | <i>HTRA4</i>      | chr8:38831693   | 0.326677              | 0.8065622         |
| cg26391080      | <i>SH2D4B</i>     | chr10:82297397  | 0.2446444             | 0.7164751         |
| cg04268405      | <i>CHST3</i>      | chr10:73723221  | 0.3038281             | 0.7697753         |
| cg18003231      | <i>SLC25A18</i>   | chr22:18043745  | 0.338008              | 0.8015152         |
| cg07221454      | <i>MS4A10</i>     | chr11:60552841  | 0.3696114             | 0.8319            |
| cg27138018      | <i>HAPLN2</i>     | chr1:156589303  | 0.7018688             | 0.14438           |
| cg20837735      | <i>SERPINB5</i>   | chr18:61144177  | 0.7766621             | 0.24563           |
| cg04947157      | <i>TMC6</i>       | chr17:76128481  | 0.7826197             | 0.26564           |
| cg16812893      | <i>KRTAP15-1</i>  | chr21:31813075  | 0.8299733             | 0.3148037         |
| cg19863740      | <i>PARVG</i>      | chr22:44576869  | 0.8461855             | 0.3367151         |
| cg24625388      | <i>NEBL</i>       | chr10:21463858  | 0.7409687             | 0.23289           |
| cg15779716      | <i>CDCP1</i>      | chr3:45188208   | 0.7839137             | 0.2809805         |
| cg16431978      | <i>KRTAP13-3</i>  | chr21:31797932  | 0.7818451             | 0.2855307         |
| cg07908874      | <i>TUBGCP2</i>    | chr10:135123006 | 0.8462345             | 0.3531863         |
| cg15503752      | <i>ST6GALNAC1</i> | chr17:74639731  | 0.7422057             | 0.2551071         |
| cg16869108      | <i>VHL</i>        | chr3:10184319   | 0.7775884             | 0.2921941         |
| cg18484189      | <i>NALP10</i>     | chr11:7984973   | 0.7187174             | 0.2335832         |
| cg09577651      | <i>SIRPB1</i>     | chr20:1600705   | 0.6798352             | 0.1949            |
| cg00744433      | <i>CXADR</i>      | chr21:18884067  | 0.7040575             | 0.2209252         |
| cg13699808      | <i>PRKCBP1</i>    | chr20:45985339  | 0.6632204             | 0.1804767         |
| cg26799474      | <i>CASP8</i>      | chr2:202098951  | 0.7425413             | 0.2681976         |
| cg05093686      | <i>MAB21L1</i>    | chr13:36050788  | 0.6973728             | 0.2235912         |
| cg04958389      | <i>PRSS2</i>      | chr7:142178834  | 0.7819808             | 0.3094698         |
| cg13015534      | <i>ST6GALNAC1</i> | chr17:74639793  | 0.6793536             | 0.2117928         |
| cg20312687      | <i>DEFB118</i>    | chr20:29956585  | 0.7488325             | 0.2844683         |
| cg15928132      | <i>CCKAR</i>      | chr4:26492378   | 0.7338183             | 0.2702046         |
| cg01119135      | <i>C1orf116</i>   | chr1:207205525  | 0.7210817             | 0.25862           |
| cg23213217      | <i>DEGS1</i>      | chr1:224370155  | 0.6574602             | 0.1954208         |
| cg06353345      | <i>OR51B4</i>     | chr11:5322976   | 0.7230261             | 0.2615176         |
| cg13944141      | <i>PRSS2</i>      | chr7:142178732  | 0.7540907             | 0.29778           |
| cg07705908      | <i>SPDEF</i>      | chr6:34523925   | 0.7049554             | 0.2499029         |
| cg11204562      | <i>C10orf81</i>   | chr10:115511153 | 0.7813558             | 0.3263988         |
| cg08970694      | <i>HBE1</i>       | chr11:5290746   | 0.760081              | 0.3058824         |
| cg14992108      | <i>SNTB1</i>      | chr8:121825470  | 0.8063309             | 0.3536            |
| cg07014174      | <i>KRTAP11-1</i>  | chr21:32253760  | 0.8254418             | 0.37355           |
| cg18462653      | <i>DEFB119</i>    | chr20:29978176  | 0.6617294             | 0.2128086         |
| cg25391023      | <i>BTNL2</i>      | chr6:32374754   | 0.7314647             | 0.2874903         |
| cg21032583      | <i>LMLN</i>       | chr3:197685803  | 0.8614061             | 0.4180812         |



|            |                  |                |           |           |
|------------|------------------|----------------|-----------|-----------|
| cg03973663 | <i>LYN</i>       | chr8:56791576  | 0.6723252 | 0.2311828 |
| cg23092086 | <i>CES7</i>      | chr16:55909573 | 0.8311277 | 0.3922399 |
| cg05656364 | <i>VAMP8</i>     | chr2:85804732  | 0.5811541 | 0.1435274 |
| cg25336198 | <i>INS</i>       | chr11:2182618  | 0.7679843 | 0.3323422 |
| cg07785936 | <i>GPR39</i>     | chr2:133174635 | 0.7735475 | 0.3384631 |
| cg18414381 | <i>EHF</i>       | chr11:34642885 | 0.6534631 | 0.2197619 |
| cg14826683 | <i>SPRR2D</i>    | chr1:153013830 | 0.7859129 | 0.3552492 |
| cg15979932 | <i>CUEDC1</i>    | chr17:55980107 | 0.6582447 | 0.2276992 |
| cg24816455 | <i>SEMA3B</i>    | chr3:50310766  | 0.5566738 | 0.1273792 |
| cg06640279 | <i>FAIM3</i>     | chr1:207095153 | 0.6885841 | 0.2607817 |
| cg02537838 | <i>C20orf151</i> | chr20:61002595 | 0.7638559 | 0.3391269 |
| cg14153740 | <i>TRY1</i>      | chr7:141957702 | 0.8020787 | 0.3783582 |
| cg21414251 | <i>OR12D2</i>    | chr6:29364554  | 0.6287672 | 0.206     |
| cg00480115 | <i>FXVD3</i>     | chr19:35606877 | 0.7187619 | 0.2969786 |
| cg13897627 | <i>FLJ44674</i>  | chr16:49378497 | 0.7881786 | 0.3706771 |
| cg11300809 | <i>SGPP2</i>     | chr2:223288637 | 0.7173604 | 0.3001219 |
| cg10503138 | <i>CNTN4</i>     | chr3:2142391   | 0.824102  | 0.4089383 |
| cg20856834 | <i>OR12D3</i>    | chr6:29342522  | 0.6801739 | 0.2690438 |
| cg27496506 | <i>TGM5</i>      | chr15:43559170 | 0.6940689 | 0.2859037 |
| cg12334759 | <i>C19orf19</i>  | chr19:475154   | 0.8420037 | 0.43519   |
